# Supplementary material for: Hyperinsulinemia Promotes Esophageal Cancer Development in a Surgically-Induced Duodeno-Esophageal Reflux Murine Model
Source: Int J Mol Sci. 2018 Apr 14;19(4):1198. doi: 10.3390/ijms19041198 (PMC5979452; doi:10.3390/ijms19041198)
Supplement: Supplementary file 1 [file ijms-19-01198-s001.pdf]

Table S1

| GROUP                | WT F (A)                  | WT M (B)                  | MKR F (C)                 | MKR M (D)                  | K-W test            | A vs. B             | C vs. D | A vs. C             | B vs. D             |
|----------------------|---------------------------|---------------------------|---------------------------|----------------------------|---------------------|---------------------|---------|---------------------|---------------------|
| GLUCOSE<br>(mg/dL)   | 130.0<br>(114.3;142.3)    | 158.0<br>(148.8;181.5)    | 151.0<br>(131.5; 159.8)   | 193.0<br>(161.8; 206.8)    | 0.078               | 0.115               | 0.046   | 0.318               | 0.141               |
| INSULIN<br>(pg/mL)   | 286.3<br>(273.8;440.3)    | 812.0<br>(736.4;924.2)    | 2523.6<br>(1445.1;4244.5) | 5070.3<br>(2675.0;13761.5) | $1.3 \cdot 10^{-5}$ | $1.6 \cdot 10^{-3}$ | 0.076   | $7.8 \cdot 10^{-4}$ | $9.1 \cdot 10^{-4}$ |
| C-PEPTIDE<br>(pg/mL) | 391.7<br>(377.3;432.3)    | 774.0<br>(588.5;892.9)    | 1270.7<br>(859.2;1952.0)  | 1534.2<br>(954.9;2101.7)   | $6.1 \cdot 10^{-4}$ | 0.027               | 0.700   | $3.3 \cdot 10^{-3}$ | $5.5 \cdot 10^{-3}$ |
| LEPTIN<br>(pg/mL)    | 2285.7<br>(2038.7;2904.3) | 4400.1<br>(3664.3;5778.7) | 1095.9<br>(933.7;1204.7)  | 1089.2<br>(917.1;1441.4)   | $3.6 \cdot 10^{-5}$ | 0.021               | 0.834   | $7.8 \cdot 10^{-4}$ | $7.8 \cdot 10^{-4}$ |

**Table S1. Basal serum metabolic parameters in non-operated WT and MKR mice at 13 weeks of age.** Data were expressed as Median (Q1; Q3). K-W test indicates Kruskal-Wallis test result used for multiple comparisons among the four groups of mice. The columns with the header in gray show the Mann-Whitney U-test result used to compare data distribution between two groups of mice. A p-value lower than 0.008 was considered statistically significant (Bonferroni correction).

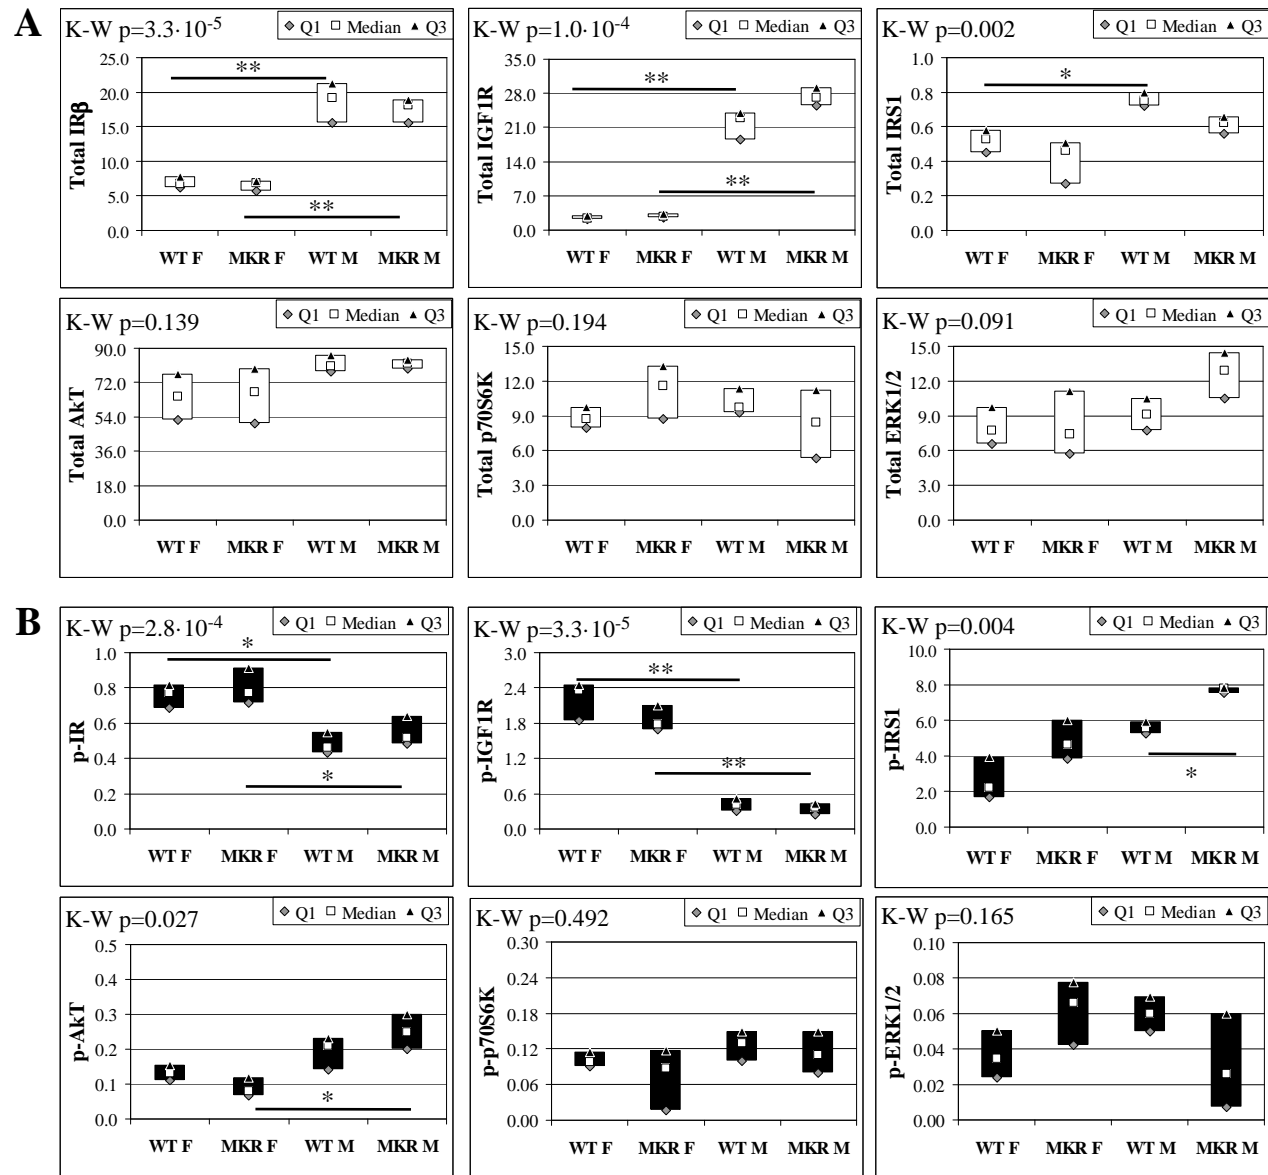

**Figure S1. Basal insulin signaling in non-operated mice esophageal tissue at 13 weeks of age.** Data are represented as Median (Q1; Q3). K-W indicates Kruskal-Wallis test result used for multiple comparisons among the four groups of mice. Mann-Whitney U-test was performed to evaluate the differences between the two groups WT and MKR with the same gender. \* $p < 0.008$ ; \*\* $p < 8 \cdot 10^{-4}$ . **A.** Total protein expression: the quantity of each total protein considered was expressed in ng/100 mg of total protein extracted by the distal mice esophageal segment. **B.** Phosphorylated protein expression: the amount of the six phospho- proteins considered was expressed as phosphorylated Units for each ng of the corresponding total protein amount. Proteins were quantified by Luminex-xMAP Technology on the basis of a standard curve. Beta-tubulin expression was used as internal loading control.
